# Supplementary material for: In situ study of nucleation and aggregation phases for nanoparticles grown by laser-driven methods
Source: PubMed Central journal article supplement (PMC5307318; doi:10.1038/srep41372), 2017-02-14
Supplement: srep41372-s1.pdf [file srep41372-s1.pdf]

## In situ study of nucleation and aggregation phases for nanoparticles grown by laser-driven methods

M. Barberio<sup>1</sup>, P. Antici<sup>1</sup>

<sup>1</sup>*INRS-EMT, 1650 Boul. Lionel Boulet, Varennes, J3X1S2, Canada*

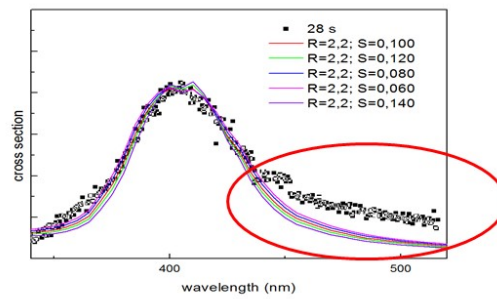

Supporting 1: Five different tentative fits using a larger variance in the convoluted LogNorm function. The proposed fits do not converge in the region of 500 nm.
